# Supplementary material for: Bacterioneuston in Lake Baikal: Abundance, Spatial and Temporal Distribution
Source: PubMed Central journal article supplement (PMC6266163; doi:10.3390/ijerph15112587), 2018-11-19
Supplement: ijerph-15-02587-s001.pdf [file ijerph-15-02587-s001.pdf]

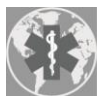

**Table S1.** Location of the SML and UW sampling stations in Lake Baikal in 2013–2016.

| No. | Sampling Station                                                    | Latitude (N) | Longitude (E) |
|-----|---------------------------------------------------------------------|--------------|---------------|
| 1   | 12 km from Kultuk village                                           | 51°40.631'   | 103°52.461'   |
| 2   | 3 km from Solzan village                                            | 51°31.818'   | 104°13.808'   |
| 3   | central station of section Marituy village–Solzan village           | 51°38.808'   | 104°13.642'   |
| 4   | 3 km from Maritui village                                           | 51°45.575'   | 104°13.170'   |
| 5   | central station of section Ivanovskii Cape–Murino village           | 51°38.761'   | 104°25.827'   |
| 6   | Listvenichnyi Bay                                                   | 51°50.648'   | 104°49.652'   |
| 7   | central station of section Listvyanka village–Tankhoi village       | 51°42.330'   | 105°00.597'   |
| 8   | 3 km from Tankhoi village                                           | 51°35.510'   | 105°06.747'   |
| 9   | opposite Bolshie Koty village                                       | 51°53.432'   | 104°58.841'   |
| 10  | opposite Babyshkin village                                          | 51°45.012'   | 105°50.141'   |
| 11  | Peschanaya Bay                                                      | 52°11.708'   | 105°40.880'   |
| 12  | Babushka Bay                                                        | 52°15.592'   | 105°42.453'   |
| 13  | 1 km from Kharauz branch (Selenga River)                            | 52°17.609'   | 106°14.732'   |
| 14  | 3 km from Kharauz branch (Selenga River)                            | 52°17.485'   | 106°12.629'   |
| 15  | central station of section the Anga River–Sukhaya River             | 52°39.914'   | 106°51.321'   |
| 16  | Mukhor Bay (Maloe More strait)                                      | 53°02.102'   | 106°46.428'   |
| 17  | Bazarnaya Bay (Olkhonskie Vorota strait)                            | 53°01.356'   | 106°52.193'   |
| 18  | central station of Olkhonskie Vorota strait                         | 53°01.566'   | 106°54.293'   |
| 19  | central station of Maloe More strait                                | 53°14.546'   | 107°15.242'   |
| 20  | opposite Zunduk Cape (Maloe More strait)                            | 53°23.593'   | 107°24.837'   |
| 21  | 3 km from the Ukhan Cape                                            | 53°02.973'   | 107°25.348'   |
| 22  | central station of section the Ukhan Cape–Tonkii Cape               | 52°53.726'   | 107°31.915'   |
| 23  | 3 km from the Tonkii Cape                                           | 52°44.582'   | 107°38.475'   |
| 24  | Shunte Pravyi Cape                                                  | 53°17.148'   | 107°48.276'   |
| 25  | Barguzinskii Bay                                                    | 53°27.230'   | 108 44.294'   |
| 26  | Chivyrkuiskii Bay                                                   | 53°49.652'   | 109°08.163'   |
| 27  | central station of section the Pokoiniki Cape–Great Ushkanii Island | 53°56.514'   | 108°25.905'   |
| 28  | central station of section the Cape Zavorotnyi–Sosnovka River       | 54°14.595'   | 108 59.828'   |
| 29  | 3 km from Davsha village                                            | 54°22.657'   | 109°25.217'   |
| 30  | central station of section the Cape Elokhin–Davsha village          | 54°27.143'   | 109 03.943'   |
| 31  | central station of section the Kotelnikovskii Cape–Amnundakan River | 55°02.738'   | 109°26.028'   |
| 32  | 3 km from the Turali Cape                                           | 55°17.643'   | 109°42.805'   |
| 33  | central station of section Baikalskoe village–Turali Cape           | 55°19.228'   | 109°28.933'   |
| 34  | 3 km from Baikalskoe village                                        | 55°21.005'   | 109°14.853'   |
| 35  | Ayaya Bay                                                           | 55°27.211'   | 109°46.836'   |
| 36  | Frolikha Bay                                                        | 55°32.937'   | 109°47.504'   |
| 37  | opposite Frolikha Bay                                               | 55°32.073'   | 109°43.929'   |
| 38  | central station of section Tyya River–Nemnyanka Cape                | 55°34.064'   | 109°35.660'   |
| 39  | Birakan Cape                                                        | 55°37.444'   | 109°50.766'   |
| 40  | 5 km from the Verkhnyaya Angara River                               | 55°40.665'   | 109°49.607'   |
| 41  | Angara-Kicher shoal (Millionnyi island)                             | 55°43.607'   | 109°44.702'   |
| 42  | 7 km from Nizhneangarsk city                                        | 55°43.174'   | 109°37.842'   |
